# Supplementary material for: Target Uncertainty Mediates Sensorimotor Error Correction
Source: PubMed Central journal article supplement (PMC5271325; doi:10.1371/journal.pone.0170466), 2017-01-27

High uncertainty (left)

Low uncertainty

High uncertainty (right)

**A**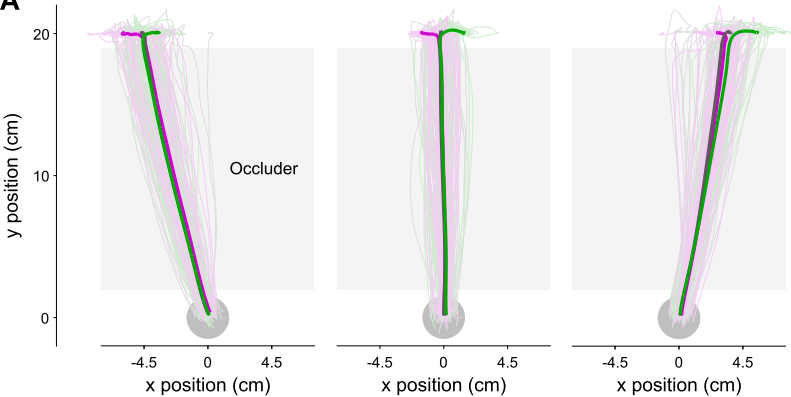

— Mean perturbation 1.5 cm  
— No perturbation  
— Mean perturbation -1.5 cm

**B**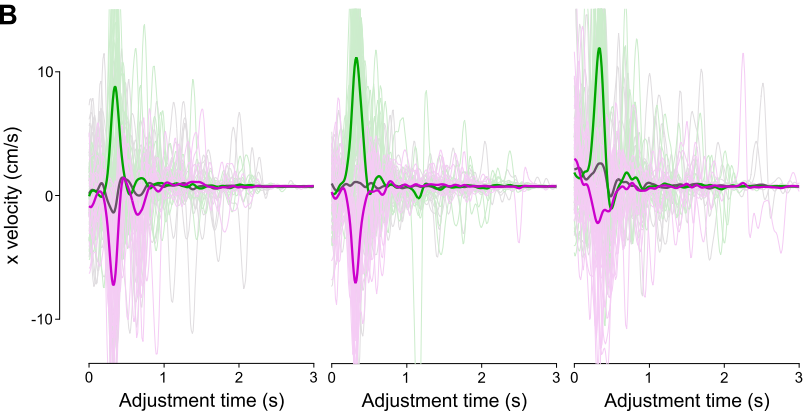

Supplement: pone.0170466.s001.pdf [file pone.0170466.s001.pdf]
